# Supplementary material
Source: PubMed Central journal article supplement (PMC5347560)
Supplement: pnas.1615255114.sapp.pdf [file pnas.1615255114.sapp.pdf]

1 SUPPLEMENTAL FIGURES, TABLE, AND METHODS

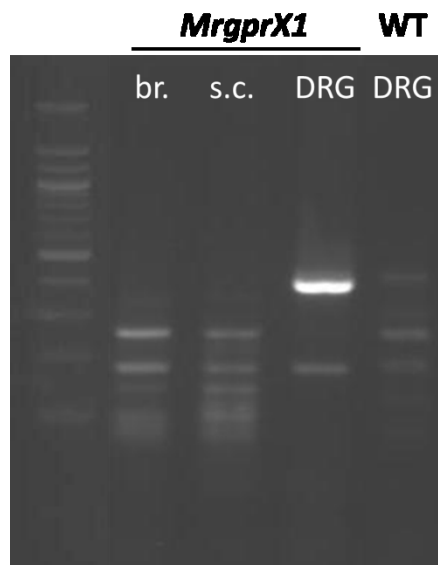

2

3 **SI Appendix, Fig. S1. The expression of *MrgprX1* mRNA in the DRG of humanized**  
4 ***MrgprX1* mice.**

5 Reverse transcript PCR shows the expression of *MrgprX1* mRNA in dorsal root ganglion  
6 (DRG) neurons but not in brain or spinal cord. br.=brain, s.c.=spinal cord, ctrl = DRGs  
7 from wildtype (WT) littermate without *MrgprX1* transgene.

8

9

10

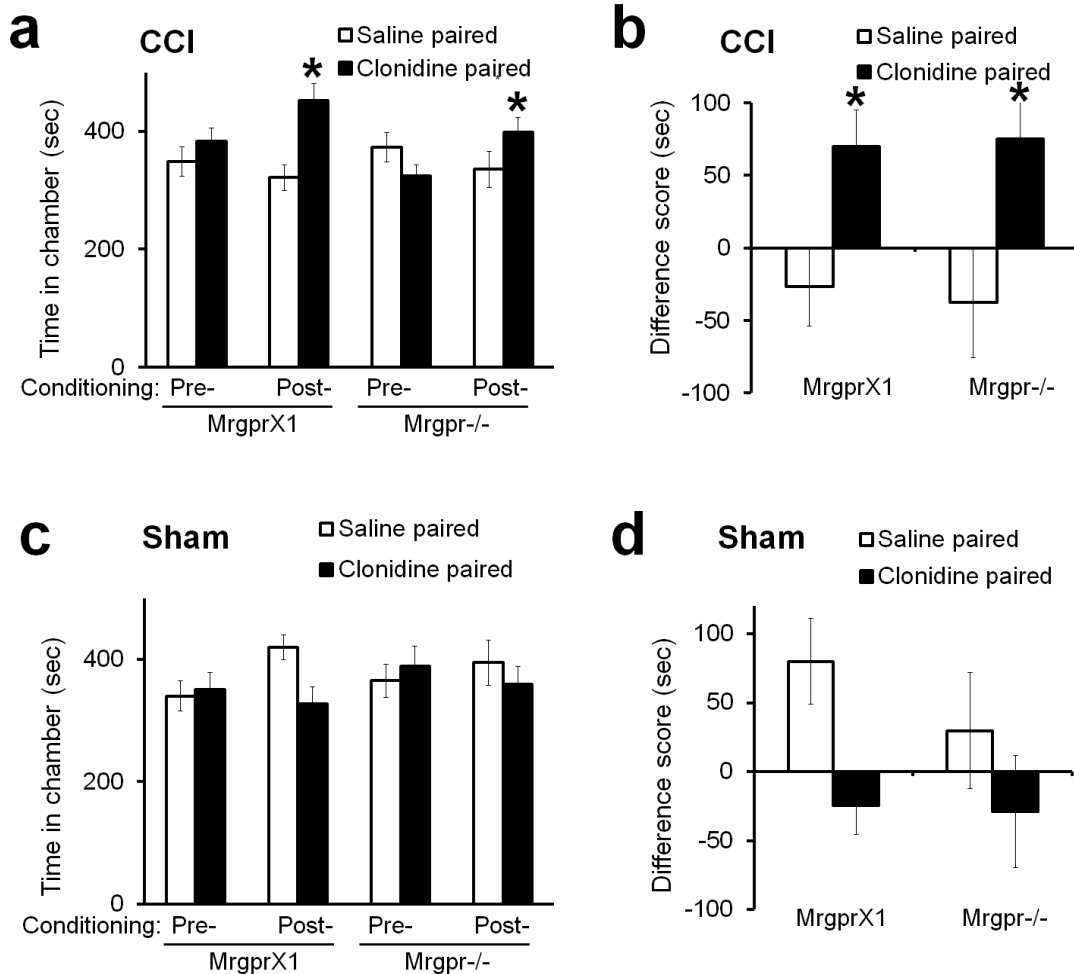

1

2 **SI Appendix, Fig. S2. Positive control of conditioned place preference induced by**  
3 **clonidine after nerve injury.**

4 **(a)** Intrathecal administration of clonidine (1  $\mu$ g, 5  $\mu$ L saline) induced chamber  
5 preference in both *MrgprX1* and *Mrgpr-/-* mice at day 7–13 after chronic constriction  
6 injury (CCI) of sciatic nerve ( $n=12$ /group). \* $P<0.05$  vs pre-conditioning. **(b)** The  
7 difference score analysis confirmed that both genotypes showed preference for the  
8 clonidine-paired chambers. \* $P<0.05$  vs. saline. **(c)** The same dose of clonidine did not  
9 induce chamber preference in sham-operated mice, regardless of genotype  
10 ( $n=12$ /group). **(d)** The difference score confirmed that neither genotype showed a  
11 preference for the clonidine-paired chamber. a,c: Two-way repeated measures ANOVA,  
12 with Bonferroni *post hoc* test. b,d: Paired t-test.

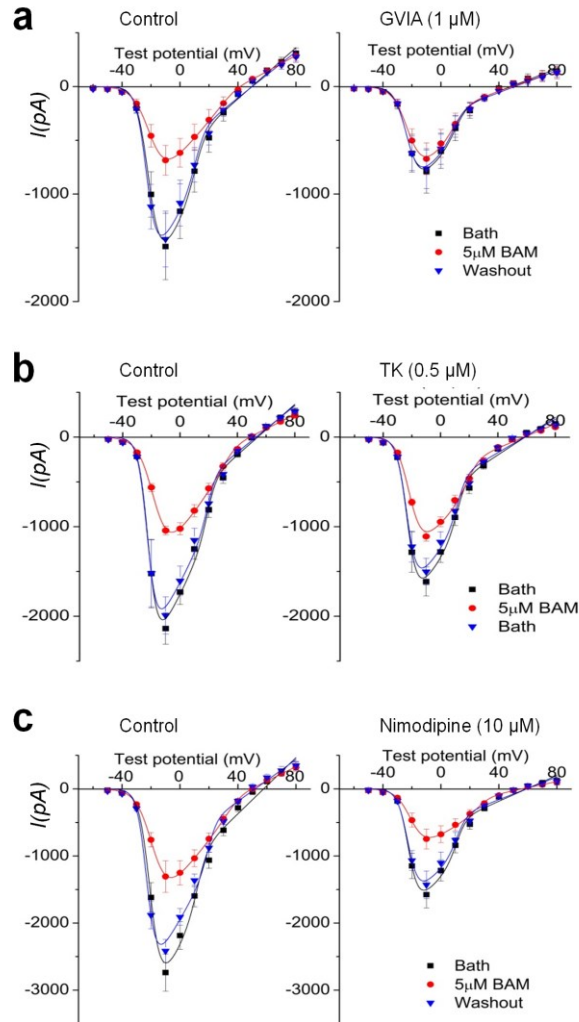

1

2 **SI Appendix, Fig. S3. Examples of BAM8–22-induced inhibition of different types**  
 3 **of high-voltage-activated (HVA)  $I_{Ca}$  in DRG neurons from *MrgprX1* mice.**

4 **(a)** Left: In a control experiment (no blocker, BAM8–22 [BAM] 5  $\mu$ M) inhibited HVA  $I_{Ca}$  by  
 5 about 50%. Right: N-type HVA calcium channel blocker  $\omega$ -conotoxin GVIA (1  $\mu$ M, GVIA)  
 6 largely abolished BAM8–22-induced HVA  $I_{Ca}$  inhibition. **(b)** Left: Without blocker, BAM  
 7 strongly inhibited HVA  $I_{Ca}$ . Right: Current-voltage relationship graphs show that  $\omega$ -  
 8 agatoxin TK (0.5  $\mu$ M, TK), a P/Q-type HVA calcium channel blocker, abolished half of  
 9 BAM8–22-induced HVA  $I_{Ca}$  inhibition. **(c)** Left: The inhibition of HVA  $I_{Ca}$  by BAM without  
 10 blocker. Right: Nimodipine (10  $\mu$ M), an L-type HVA calcium channel blocker did not  
 11 reduce BAM8–22-induced HVA  $I_{Ca}$  inhibition.  $n=5-7$  neurons/group.

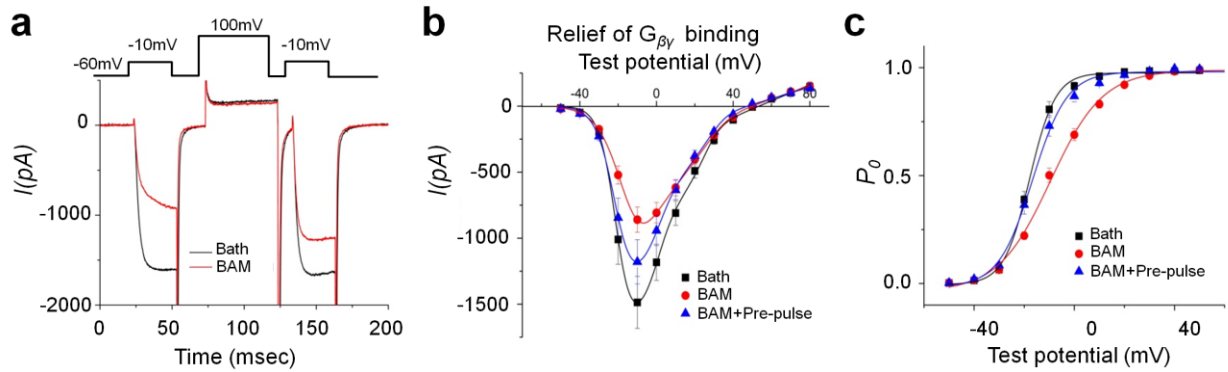

1  
 2 **SI Appendix, Fig. S4. Inhibition of HVA  $I_{Ca}$  by BAM8-22 partially depends on  $G_{\alpha i/o}$ -**  
 3 **sensitive  $G_{\beta\gamma}$  binding in DRG neurons from *MrgprX1* mice.**

4 **(a)** A representative trace shows the sandwich stimulation protocol used to relieve  $G_{\beta\gamma}$   
 5 binding to the HVA  $Ca^{2+}$  channels with and without bath application of BAM8-22 (BAM,  
 6 5  $\mu$ M). **(b)** A graph of the current-voltage relationship shows that the depolarizing pre-  
 7 pulse reversed 50% of BAM8-22-induced inhibition of HVA  $I_{Ca}$ . **(c)** Open probability  
 8 shows that the depolarizing pre-pulse reversed the voltage dependence of the channel.  
 9  $n=5-6$  neurons /group.

10

11

1

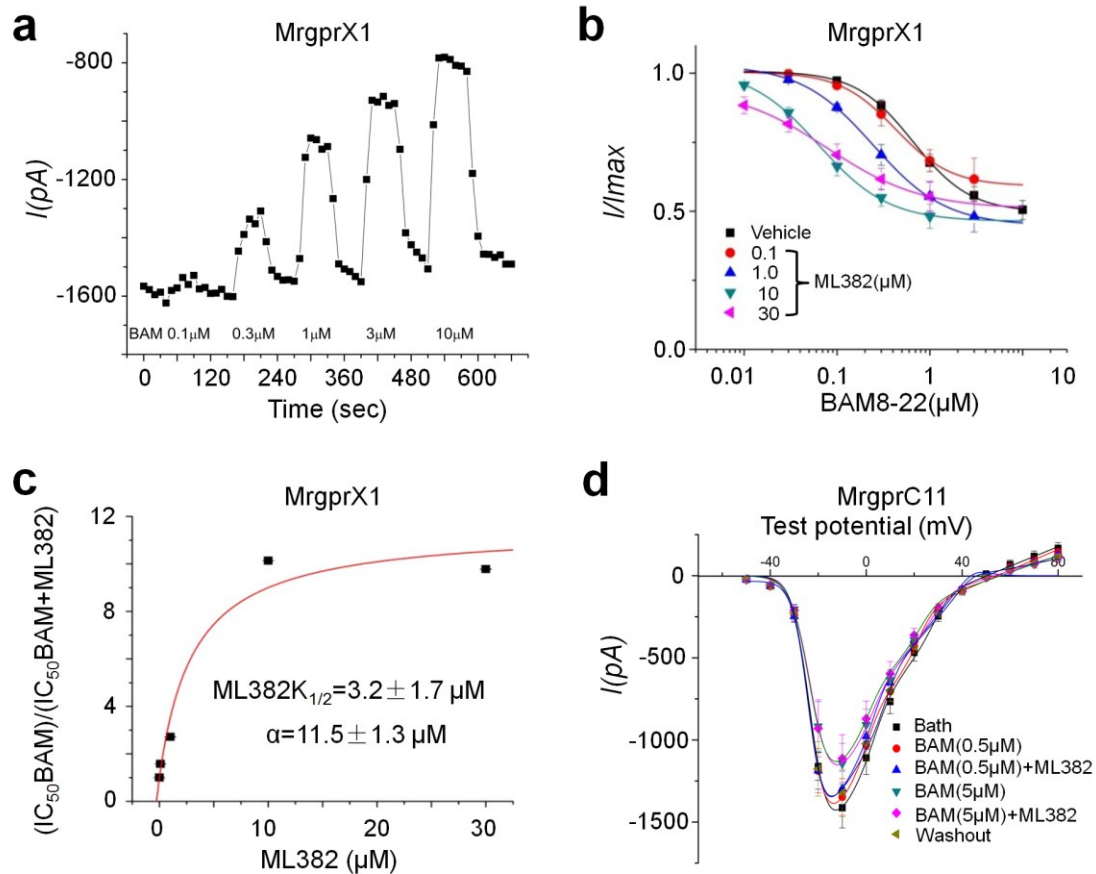

2

3 **SI Appendix, Fig. S5. Quantification of the potency of ML382 as a positive**  
4 **allosteric modulator for *MrgprX1*.**

5 **(a)** A representative time course shows the protocol used to measure the dose-response  
6 curve of BAM8–22-induced inhibition of HVA  $I_{Ca}$  in DRG neurons from *MrgprX1* mice. **(b)**  
7  $IC_{50}$  of BAM8–22, estimated from the Hill equation in the presence and absence of  
8 different concentrations of ML382 (0.1–30 μM) **(c)** The curve used to calculate the  $EC_{50}$   
9 and the  $\alpha$  value of ML382. **(d)** ML382 did not enhance BAM8–22 inhibition of HVA  $I_{Ca}$   
10 through mouse MrgprC11.  $n=6-8$  neurons/group.

11

1

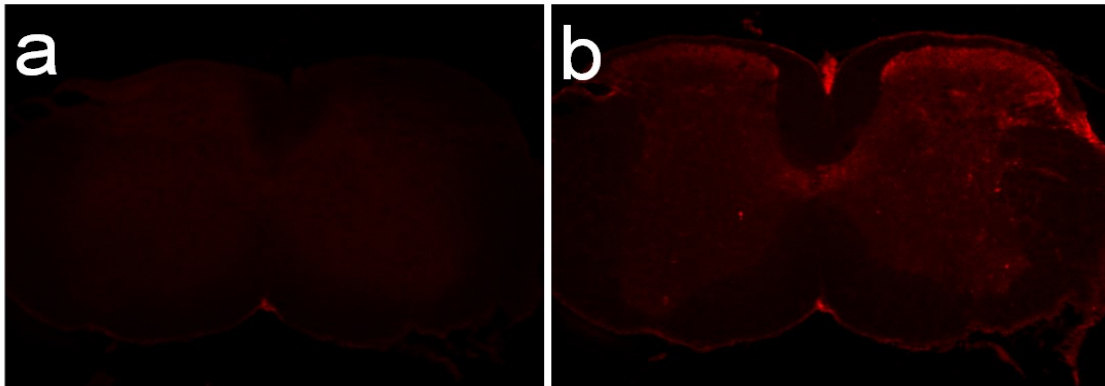

2

3 **SI Appendix, Fig. S6. Validation of BAM22 antibody.**

4 **(a)** The anti-BAM22 antiserum was pre-absorbed with  $10^{-6}$  M BAM22, resulting in the  
5 absence of BAM22 signal. **(b)** A continuous section of the spinal cord from the same  
6 animal was stained with anti-BAM22 antibody that was not pre-absorbed. The BAM22  
7 immunoreactivity is visible on the superficial layers of dorsal horn. The higher signal  
8 level on the right side was ipsilateral to the CFA treatment on the hind paw.

9

10

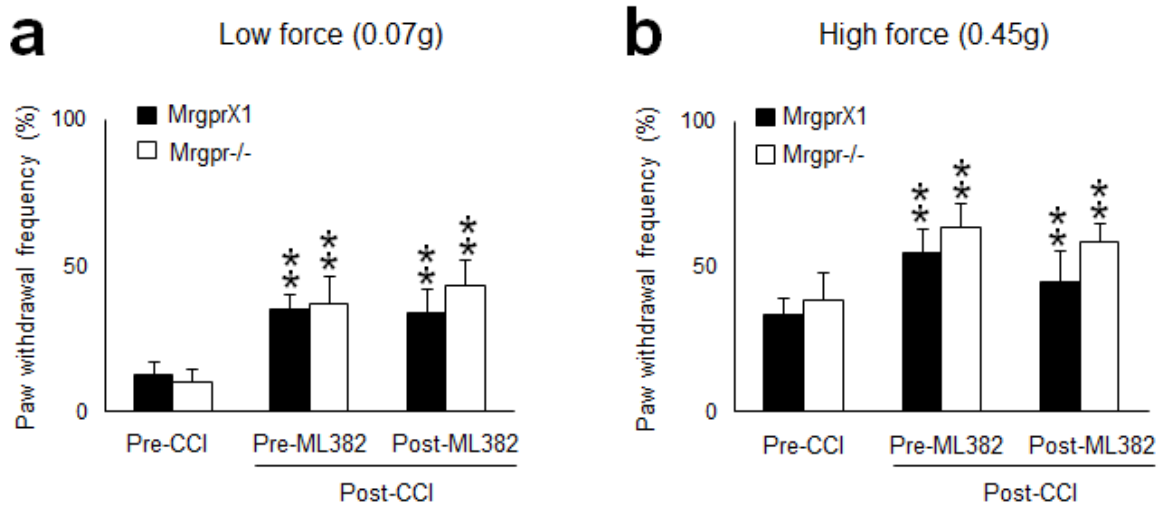

1  
2

3 **SI Appendix, Fig. S7. Intrathecal injection ML382 did not attenuate mechanical**  
4 **hypersensitivity in mice after nerve injury.**

5 **(a)** At 2 weeks after chronic constriction injury (CCI) of the sciatic nerve, the paw  
6 withdrawal frequencies (PWF) to a lower force (0.07g) and **(b)** a higher force (0.45g) von  
7 Frey mechanical stimulation applied to the ipsilateral hindpaw were significantly  
8 increased from the respective pre-injury baselines in MrgprX1 (n=8) and Mrgpr-/-mice  
9 (n=6). Intrathecal administration of ML382 (0.25 mM, 5  $\mu$ L, i.th.) did not significantly  
10 reduce the increased PWF in response to either low-force or high-force stimuli  
11 regardless of genotype. \*\*P < 0.01 vs pre-CCI, two-way mixed model ANOVA with  
12 Bonferroni *post hoc* test.

13

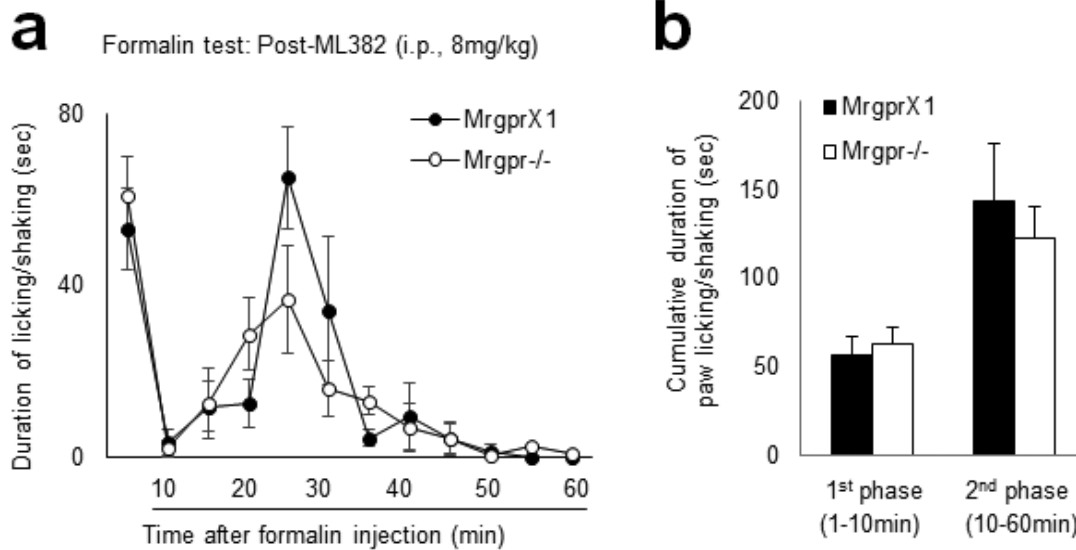

1

2 **SI Appendix, Fig. S8. Intraperitoneal administration of ML382 did not reduce**  
 3 **formalin-induced pain.**

4 **(a)** Time course of pain behaviour elicited by intraplantar injection of formalin (2%, 5  $\mu$ L)  
 5 into MrgprX1 and Mrgpr-/- mice that had been pretreated with intraperitoneal injection of  
 6 ML382 (8mg/kg, i.p.). **(b)** Cumulative duration of paw licking and shaking after formalin  
 7 injection showed that the first and second phases of pain behaviour were not  
 8 significantly reduced by ML382 in mice regardless of genotypes.  $n=8$ /group, two-way  
 9 mixed model ANOVA with Bonferroni *post hoc* test.

10



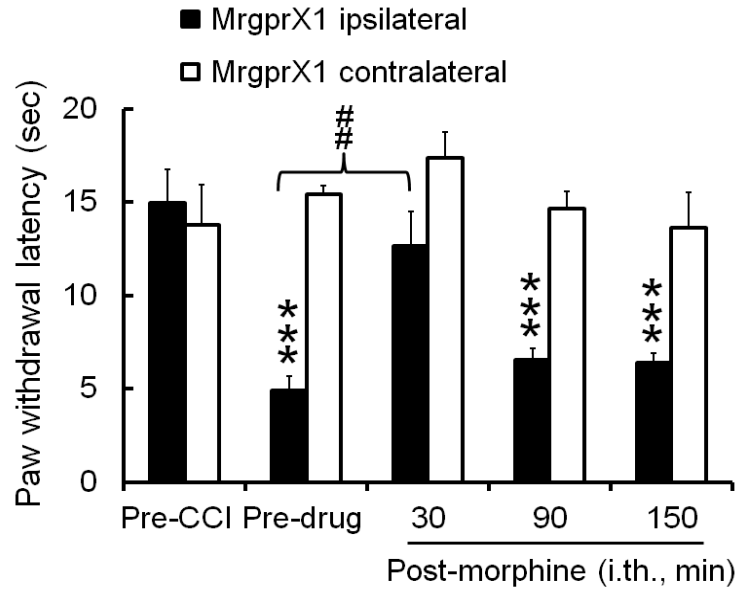

1

2 **SI Appendix, Fig. S9. Morphine attenuates heat hypersensitivity in MrgprX1 mice**  
 3 **after nerve injury.**

4 At 2 weeks after chronic constriction injury (CCI) of the sciatic nerve, the paw withdrawal  
 5 latency (PWL) to radiant heat stimulation was significantly decreased from pre-injury  
 6 baseline in the ipsilateral hindpaw of MrgprX1 mice. The heat hypersensitivity in the  
 7 ipsilateral hindpaw was attenuated at 30 min after an intrathecal administration of  
 8 morphine (5 $\mu$ l, 1mM, i.th.). Contralateral PWL was not altered by CCI or morphine  
 9 treatment in MrgprX1 mice. ##P < 0.01 vs pre-drug baseline, \*\*\*P < 0.001 vs pre-CCI,  
 10 n=8, two-way mixed model ANOVA with Bonferroni *post hoc* test.

11

12

13

14

| <b>Time</b> | <b>Mouse</b> | <b>Rat</b> | <b>Human</b> |
|-------------|--------------|------------|--------------|
| <b>0 hr</b> | 100%         | 100%       | 100%         |
| <b>1 hr</b> | 98.47%       | 102%       | 103%         |
| <b>4 hr</b> | 69.15%       | 91%        | 100%         |

1

2 **Supplemental Table 1. Pharmacokinetic study of ML382.** ML382 was incubated with

3 mouse, rat or human plasma for 0 hr, 1 hr, or 4 hr and then quantified by LC/MC/MC

4 analysis. ML382 was unstable in mouse plasma and stable in rat and human plasma.

## 1 SUPPLEMENTAL METHODS

### 2 Reverse transcript PCR

3 Total RNA was extracted from various tissues using RNeasy Mini Kit (Qiagen) according  
4 to the manufacturer's instructions. Reverse transcription was done by Super-Script III  
5 First-Strand Synthesis System (Invitrogen). PCR conditions: 95 °C for 3 min, 40 cycles  
6 of 30 s at 95 °C, 30 s at 55 °C and 60 s at 72 °C. The primers are located in the human  
7 *MrgprX1* exon. The sequence of primers are 5'-TCAACTTGGCCGCAGCAGACTT  
8 (forward), 5'-GAGAATCCTGATCAGCAGGACC (reverse).

### 9 Analysis of allosterism in functional assay

10 Dose-response curves were fitted with the Hill equation:

$$E(X) = E_{min} + \frac{(E_{max} - E_{min}) * X^n}{K^n + X^n}$$

11 E(X) is the effect as the function of X (drug concentration). E<sub>min</sub> and E<sub>max</sub> are  
12 the minimum and maximum effects, respectively. K is the equilibrium constant, in this  
13 case, the EC<sub>50</sub>, and n is the Hill coefficient.

14 For mechanistic study of allosteric modulation, a ternary model was used to  
15 measure the binding affinity and efficacy of an allosteric modulator. In a ternary complex  
16 model with two ligands and one receptor, the interaction within these three molecules  
17 can be described with a cyclic model:

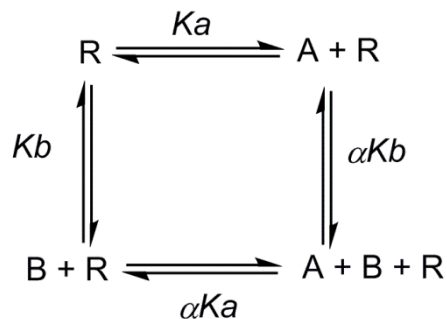

1            In this scheme, R is the receptor, A is the orthosteric ligand, and B is the  
 2 allosteric modulator.  $K_a$  and  $K_b$  indicate the association constants of ligands A and B,  
 3 respectively. When both ligands are interacting with the receptor, they each can  
 4 reciprocally affect the association constants, and the magnitude of this cooperativity is  
 5 determined by the factor  $\alpha$ . The equation that describes the ternary complex model can  
 6 be derived from the above scheme and is represented by the following:

$$\frac{K}{K'} = \frac{\alpha[B] + K_b}{[B] + K_b}$$

7             $K$  is the dissociation constant of the orthosteric ligand A,  $K'$  is the dissociation  
 8 constant of the ligand A under the influence of the modulator B, and  $K_b$  is the  
 9 dissociation constant of the allosteric modulator B. The details of the ternary complex  
 10 model and its derivation can be found in the literature (1-3). If the allosteric modulator  
 11 does not alter maximum efficacy, the dissociation constant  $K$  can represent  $EC_{50}$  of the  
 12 ligand, and the equation can be rewritten in the following form (4):

$$\frac{EC50}{EC50'} = \frac{\alpha[B] + K_b}{[B] + K_b}$$

### 13 **Plasma Protein Binding**

14            Protein binding of ML382 was determined in human, rat and mouse plasma via  
 15 equilibrium dialysis employing Single-Use RED Plates with inserts (ThermoFisher

1 Scientific, Rochester, NY). Briefly plasma (220  $\mu$ L) was added to the 96 well plate  
2 containing test article (5  $\mu$ L) and mixed thoroughly. Subsequently, 200  $\mu$ L of the plasma-  
3 test article mixture was transferred to the cis chamber (red) of the RED plate, with an  
4 accompanying 350  $\mu$ L of phosphate buffer (25 mM, pH 7.4) in the trans chamber. The  
5 RED plate was sealed and incubated 4 h at 37  $^{\circ}$ C with shaking. At completion, 50  $\mu$ L  
6 aliquots from each chamber were diluted 1:1 (50  $\mu$ L) with either plasma (cis) or buffer  
7 (trans) and transferred to a new 96 well plate, at which time ice-cold acetonitrile (2  
8 volumes) was added to extract the matrices. The plate was centrifuged (3000 rpm, 10  
9 min) and supernatants transferred to a new 96 well plate. The sealed plate was stored at  
10 -20  $^{\circ}$ C until LC/MS/MS analysis.

#### 11 **Quantitative analysis of BAM22 peptide in mouse spinal cord by mass** 12 **spectrometry**

13 BAM22 within the mouse spinal cord was quantified by the LC-SRM approach on our  
14 optimized MS platform (5). The spinal cords of CFA- and saline-treated mice were  
15 homogenized in lysis buffer (PBS, protease inhibitor cocktail from Roche) at 4  $^{\circ}$ C with  
16 0.5 mm glass beads for 5 min in a Bullet Blender instrument (Next Advance Inc.). The  
17 whole lysate was mixed with ice-cold acetonitrile at a final concentration of 80% by  
18 vortexing at 20-s intervals for 1 min, and then centrifuged at 21,000 x g for 15 min. The  
19 extracted lysate was dried before being dissolved and digested with trypsin (2  $\mu$ g per  
20 spinal cord) in 50 mM HEPES (pH 8.5) at 37 $^{\circ}$ C for 5 h. The digests were acidified with 1%  
21 TFA, pre-cleared by centrifugation, and desalted with Sep-Pak C18 SPE column  
22 (Waters). The BAM22 tryptic peptides were eluted with 45% acetonitrile plus 1% formic  
23 acid. The eluted peptides were dried, reconstituted in 5% formic acid, and analysed on  
24 Orbitrap Elite hybrid ion trap MS (Thermo Fisher Scientific), equipped with  
25 nanoelectrospray ion source and an Easy-nLC 1000 UHPLC system (Thermo Fisher

1 Scientific). Chromatography was performed on a 75  $\mu\text{m}$  x 10 cm picofrit column (New  
2 Objective) packed with C18 2.7  $\mu\text{m}$  Halo beads (New Objective). Mobile phases  
3 consisted of 0.1% formic acid as solvent A, and 0.1% formic acid/70% acetonitrile as  
4 solvent B. The digests were eluted for 20 min at 400 nL/min in a gradient of 30 to 50% B.  
5 The LC-SRM was performed with a single Orbitrap MS scan from 350 to 1600 at a  
6 resolution of 30,000 with AGC set at 1e5 followed by CID of targeted SRM scans of  
7 BAM22 tryptic peptides. For the quantification of BAM22 in mouse spinal cords, the m/z  
8 transition of  $[\text{M}+3\text{H}]^{3+}$  precursor ion of BAM22<sub>8-19</sub> peptide to its product ions was  
9 monitored, and the peak areas were calculated by Xcalibur software. Human ubiquitin  
10 peptide VGRPEWWMDYQK (100 fmol) was spiked into each run as an internal standard  
11 to offset the run-to-run variation. To estimate the absolute amount of BAM22 peptide in  
12 the mouse spinal cord, we spiked synthetic BAM22 tryptic digests (250 fmol) into the  
13 extracts and analysed them. The peak area of synthetic BAM22<sub>8-19</sub> peptide was obtained  
14 by comparing two runs with or without the spike-in. Relative amounts of BAM22 in CFA-  
15 and saline-treated mouse spinal cords were determined by calculating the difference in  
16 peak area of multiple SRM transitions of BAM22<sub>8-19</sub> peptide between the two samples.

17 **Whole-cell voltage-clamp recordings from spinal cord slices.** We used  
18 procedures as described previously (48). Briefly, the lumbosacral segment of spinal cord  
19 was removed rapidly from CFA-treated MrgprX1 mice or Mrgpr<sup>-/-</sup> mice and placed in ice-  
20 cold, low-sodium Krebs solution (in mM: 95 NaCl, 2.5 KCl, 26 NaHCO<sub>3</sub>, 1.25 NaH<sub>2</sub>PO<sub>4</sub>-  
21 H<sub>2</sub>O, 6 MgCl<sub>2</sub>, 1.5 CaCl<sub>2</sub>, 25 glucose, 50 sucrose, 1 kynurenic acid) saturated with  
22 95%O<sub>2</sub>/5% CO<sub>2</sub>. For electrophysiology recording, slices were stabilized with a grid (ALA  
23 Scientific, Farmingdale, NY, USA) and submerged in a low-volume recording chamber  
24 (SD Instruments, San Diego, CA, USA) that was perfused with room-temperature Krebs  
25 solution (in mM: 125 NaCl, 2.5 KCl, 26 NaHCO<sub>3</sub>, 1.25 NaH<sub>2</sub>PO<sub>4</sub>-H<sub>2</sub>O, 1 MgCl<sub>2</sub>, 2 CaCl<sub>2</sub>,

1 and 25 glucose, with 10  $\mu\text{M}$  GABA<sub>A</sub> receptor blocker bicuculline and 1  $\mu\text{M}$  glycinergic  
2 receptor blocker strychnine) bubbled with a continuous flow of 95% O<sub>2</sub>/5% CO<sub>2</sub>. Whole-  
3 cell patch-clamp recording of lamina II cells was carried out under oblique illumination  
4 with an Olympus fixed-stage microscope system (BX51, Melville, NY, USA). Data were  
5 acquired with pClamp 10 software (Molecular Devices) and a Multiclamp amplifier. Using  
6 a puller (P1000, Sutter, Novato, CA, USA), we fabricated thin-walled glass pipettes  
7 (World Precision Instruments) that had a resistance of 3–6 M $\Omega$  and were filled with  
8 internal solution (in mM: 120 K-gluconate, 20 KCl, 2 MgCl<sub>2</sub>, 0.5 EGTA, 2 Na<sub>2</sub>-ATP, 0.5  
9 Na<sub>2</sub>-GTP, and 20 HEPES). The cells were voltage clamped at –70 mV. Membrane  
10 current signals were sampled at 10 kHz and low-pass filtered at 2 kHz. Larger-bore  
11 pipettes filled with Krebs solution were used for dorsal root stimulation. To evoke EPSCs,  
12 we delivered paired pulse test stimulation to dorsal root consisting of 2 synaptic volleys  
13 (500  $\mu\text{A}$ , 0.1 ms) 400 ms apart at a frequency of 0.05 Hz to activate high-threshold  
14 afferent fibres (C-fibres), followed by a 0.1-ms, 5-mV depolarizing pulse (to measure  
15 series resistance [ $R_{\text{series}}$ ] and input resistance [ $R_{\text{input}}$ ]). We monitored  $R_{\text{series}}$  and  $R_{\text{input}}$  and  
16 discarded cells if either of these values changed by more than 20%. The amplitudes of  
17 the first (P1) and the second (P2) EPSC were measured, and the paired pulse ratio  
18 (PPR) was calculated as  $\text{PPR} = \text{P2/P1}$ .

19 **Immunofluorescence.** For spinal cord staining, adult mice (8–12 weeks old) were  
20 anaesthetized with pentobarbital and perfused intracardially with 20 mL of 0.1 M PBS  
21 (pH 7.4, 4°C) followed by 25 mL of fixative (4% formaldehyde [vol/vol], 4°C), as  
22 previously described (13). Spinal cord was dissected from the perfused mice and post-  
23 fixed in fixative at 4°C for 1 h. Then tissues were cryoprotected in 20% sucrose (wt/vol)  
24 for 24 h at 4°C and sectioned with a Vibratome cryostat (Polysciences, Warrington, PA).  
25 The sections were placed on slides, dried at 37°C for 15 min, and fixed with 4%

1 paraformaldehyde at room temperature for 10 min. We used Tyramide Signal  
2 Amplification (TSA; PerkinElmer, Waltham, MA) according to the protocol provided. The  
3 sections were incubated with rabbit polyclonal anti-BAM22 antiserum (1:500, ATSBIO,  
4 San Diego, CA, USA) (50) in 1×TNB blocking buffer (0.1 M Tris, 0.15 M NaCl, and 0.5%  
5 [wt/vol] blocking reagent from PerkinElmer) overnight at 4°C, washed, and then  
6 incubated with secondary horseradish peroxidase-conjugated goat anti-rabbit IgG (1:500  
7 in 1×TNB, Vector Laboratories, Burlingame, CA, USA) for 1 h. TSA cyanine 3 reagent  
8 was added for the amplification step. Images were taken with a Carl Zeiss AXIO  
9 Examiner.Z1 confocal microscope (Jena, Germany).

#### 10 **CCI-induced mechanical allodynia**

11 Mechanical sensitivity was assessed with the von Frey test by the frequency method (6).  
12 Two calibrated von Frey monofilaments (low force = 0.07 g; high force = 0.45 g) were  
13 used. Each von Frey filament was applied perpendicularly to the plantar side of each  
14 hind paw for ~1 s; the stimulation was repeated 10 times to both hind paws. The  
15 occurrence of paw withdrawal in each of these 10 trials was expressed as a percent  
16 response frequency:  $PWF = (\text{number of paw withdrawals}/10 \text{ trials}) \times 100\%$ .

#### 17 **Itch behavioural study**

18 Mice were acclimatized 1 day before the test. BAM8–22 or ML382 was injected  
19 subcutaneously into the nape of the neck (50 µL), intraperitoneally (100 µL), or  
20 intrathecally (5 µL). Behavioural responses were video recorded for 30 min. The video  
21 recording was subsequently played back in slow motion, and an investigator counted the  
22 number of bouts of scratching with the hind paw around the injection site.

#### 23 **Motor function test**



1 We used the rotarod test to evaluate whether central administration of ML382  
2 affects motor function as previously described (7). All animals were brought to the  
3 behaviour room 10–20 min before the test. The mice habituated in the rotarod apparatus  
4 (Rotamex, Columbus Instruments) at a constant speed of 4 rpm for 10 min 3–5 times on  
5 day 1. Then, on day 2, they received three acceleration training sessions separated by  
6 20 min. Speeds increased from 4 rpm to 40 rpm (with a 4.0-rpm increase every 30 s).  
7 On day 3, they received three trials before drug administration (in the same acceleration  
8 mode as day 2). Then ML382 was applied intrathecally, without isoflurane. The mice  
9 were tested three times beginning 30 min after drug administration. The end point of the  
10 experiment was defined as the time at which the mice fell from the apparatus or rolled  
11 over the rod by holding onto it. The latency to the end point was recorded and analysed.

12

## 13 REFERENCES

14

- 15 1. De Lean A, Stadel JM, & Lefkowitz RJ (1980) A ternary complex model explains the  
16 agonist-specific binding properties of the adenylate cyclase-coupled beta-adrenergic  
17 receptor. *The Journal of biological chemistry* 255(15):7108-7117.
- 18 2. Samama P, Cotecchia S, Costa T, & Lefkowitz RJ (1993) A mutation-induced activated  
19 state of the beta 2-adrenergic receptor. Extending the ternary complex model.  
20 (Translated from eng) *The Journal of biological chemistry* 268(7):4625-4636 (in eng).
- 21 3. May LT, Leach K, Sexton PM, & Christopoulos A (2007) Allosteric modulation of G  
22 protein-coupled receptors. (Translated from eng) *Annu Rev Pharmacol Toxicol* 47:1-51  
23 (in eng).
- 24 4. Ehlert FJ (1988) Estimation of the Affinities of Allosteric Ligands Using Radioligand  
25 Binding and Pharmacological Null Methods. (Translated from English) *Mol Pharmacol*  
26 33(2):187-194 (in English).
- 27 5. Pagala VR, *et al.* (2015) Quantitative protein analysis by mass spectrometry. *Methods in*  
28 *molecular biology* 1278:281-305.
- 29 6. Guan Y, *et al.* (2010) Mas-related G-protein-coupled receptors inhibit pathological pain  
30 in mice. (Translated from eng) *Proceedings of the National Academy of Sciences of the*  
31 *United States of America* 107(36):15933-15938 (in eng).
- 32 7. Han L, *et al.* (2013) A subpopulation of nociceptors specifically linked to itch. (Translated  
33 from eng) *Nature neuroscience* 16(2):174-182 (in eng).

34

1 **Appendix**

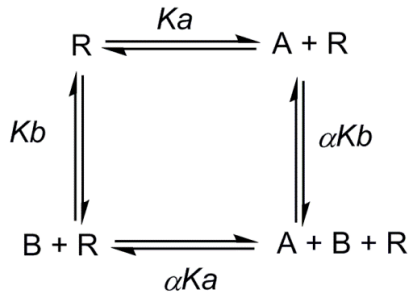

2

3  $K_a = \frac{[AR]}{[A][R]}$

4  $K_b = \frac{[BR]}{[B][R]}$

5  $\alpha K_a = \frac{[ARB]}{[A][BR]}$

6  $\alpha K_b = \frac{[ARB]}{[B][AR]}$

7  $[R_t] = [R] + [AR] + [BR] + [ABR]$

8 Fraction of binding ( $\rho$ ) =  $\frac{[AR] + [ABR]}{[R] + [AR] + [BR] + [ABR]}$

9 Since  $[AR] = K_a[A][R]$ ,  $[BR] = K_b[B][R]$ ,  $[ABR] = \alpha K_a K_b [A][B][R]$

10  $\rho = \frac{K_a[A][R] + \alpha K_a K_b [A][B][R]}{[R] + K_a[A][R] + K_b[B][R] + \alpha K_a K_b [A][B][R]} = \frac{[A](1 + \alpha K_b[B])}{\frac{1}{K_a} + [A] + \frac{K_b}{K_a}[B] + \alpha K_b[A][B]} = \frac{[A](1 + \alpha K_b[B])}{[A](1 + \alpha K_b[B]) + \frac{1 + K_b[B]}{K_a}}$

11  $= \frac{[A]}{[A] + \frac{1 + K_b[B]}{K_a(1 + \alpha K_b[B])}}$

12 Dissociation constants  $K_A = 1/K_a$  and  $K_B = 1/K_b$

13  $\rho = \frac{[A]}{[A] + \frac{K_A(1 + \frac{[B]}{K_B})}{1 + \frac{\alpha[B]}{K_B}}} = \frac{[A]}{[A] + K_A'}$

1  $K_A'$  is the apparent dissociation constant of [A] in the presence of [B].

$$2 \quad K_A' = \frac{K_A(1 + \frac{[B]}{K_B})}{1 + \alpha \frac{[B]}{K_B}} = \frac{K_A(K_B + [B])}{K_B + \alpha[B]}$$

$$3 \quad \frac{K_A}{K_A'} = \frac{\alpha[B] + K_B}{[B] + K_B}$$

4
